# Supplementary material for: Accuracy of convolutional neural network-based artificial intelligence in diagnosis of gastrointestinal lesions based on endoscopic images: A systematic review and meta-analysis
Source: PubMed Central journal article supplement — Endosc Int Open. 2020 Oct 22;8(11):E1584–94. doi: 10.1055/a-1236-3007 (PMC7581460; doi:10.1055/a-1236-3007), 2020-10-22

## Supplementary material

### SUPPLEMENTARY MATERIALS

**Appendix 1** Literature search strategy.

**Appendix 2** MOOSE checklist. From: Stroup DF, Berlin JA, Morton SC et al. for the Meta-analysis Of Observational Studies in Epidemiology (MOOSE) Group. Meta-analysis of Observational Studies in Epidemiology. A Proposal for Reporting. *JAMA*. 2000;283(15):2008-2012. doi: 10.1001/jama.283.15.2008

**Supplementary Fig. 1** Literature search flow chart.

## Supplementary material

### Appendix 1 Literature search strategy.

#### Number of results before and after de-duplication

| Database       | Number of initial hits | After de-duplication |
|----------------|------------------------|----------------------|
| EBM Reviews    | 112                    | 38                   |
| Embase         | 2260                   | 1508                 |
| Medline        | 940                    | 874                  |
| Scopus         | 2805                   | 1512                 |
| Web of Science | 1430                   | 313                  |
| Totals         | 7547                   | 4245                 |

#### EBM Reviews:

((digestive or gastr\* or GI or alimentary or esophag\* or oesophag\* or stomach or intestin\* or bowel\* or colon\* or colorectal or rectal or sigmoid or duoden\* or ileum or ileal or jejun\* or anal or anus) adj3 (polyp\* or mass\* or lesion\* or tumor\* or tumour\* or carcin\* or adeno\* or neoplas\* or cancer\* or malignan\* or sarcoma\* or lymphoma\* or leiomyosarcoma\*)).ab,hw,ti.) AND ((endoscop\* or enteroscop\* or gastroscop\* or colonoscop\* or duodenoscop\* or rectoscop\* or sigmoidoscop\* or ileocolonoscop\* or chromoendoscop\* or esophagogastroduodenoscop\* or esophagoscop\* or oesophagogastroduodenoscop\* or proctoscop\* or ERCP or anoscop\* or endomicroscop\* or oesophagoscop\* or gastroduodenoscop\* or sigmoidoscop\* or diagnos\* or patholog\*).ab,hw,ti.) AND (("artificial intelligence" or "machine learning" or "machine intelligen\*" or computer-aided or "computational intelligen\*" or "deep learning" or "deep unified network\*" or "data mining" or datamining or "supervised learning" or "semi-supervised learning" or "unsupervised learning" or "automated pattern recognition" or "Bayesian learning" or "computer heuristics" or "hidden Markov model\*" or "k-nearest neighbor\*" or "kernel method\*" or "learning algorithm\*" or "natural language processing" or "support vector" or "vector machine" or Gaussian or Bootstrap or "regression tree\*" or "linear discriminant analysis" or "naive Bayes" or "learning vector" or "random forest\*" or "chi-square automatic interaction detection" or "iterative dichotom\*" or fuzzy or "neural network\*" or perceptron\* or (computer adj1 heuristic\*).ab,hw,ti.)

#### Embase (1974+)

(digestive system cancer/ or exp esophagus cancer/ or exp intestine cancer/ or exp stomach cancer/ or digestive system tumor/ or exp esophagus tumor/ or exp gastrointestinal tumor/ or exp intestine tumor/ or exp stomach tumor/ or ((digestive or gastr\* or GI or alimentary or esophag\* or oesophag\* or stomach or intestin\* or bowel\* or colon\* or colorectal or rectal or sigmoid or duoden\* or ileum or ileal or jejun\* or anal or anus) adj3 (polyp\* or mass\* or lesion\* or tumor\* or tumour\* or carcin\* or adeno\* or neoplas\* or cancer\* or malignan\* or sarcoma\* or lymphoma\* or leiomyosarcoma\*)).ab,kw,ti.) AND (digestive tract endoscopy/ or exp chromoendoscopy/ or exp endoscopic retrograde cholangiopancreatography/ or exp esophagogastroduodenoscopy/ or exp esophagoscopy/ or exp gastrointestinal endoscopy/ or digestive endoscope/ or exp anoscope/ or exp balloon enteroscopy/ or exp capsule endoscopy/ or exp colonoscopy/ or exp digestive endomicroscope/ or exp duodenoscopy/ or exp esophagoscopy/ or exp gastroduodenoscopy/ or exp gastroscopy/ or exp proctoscopy/ or exp sigmoidoscopy/ or

(endoscop\* or enteroscop\* or gastroscop\* or colonoscop\* or duodenoscop\* or rectoscop\* or sigmoidoscop\* or ileocolonoscop\* or chromoendoscop\* or esophagogastroduodenoscop\* or esophagoscop\* or oesophagogastroduodenoscop\* or proctoscop\* or ERCP or anoscop\* or endomicroscop\* or oesophagoscop\* or gastroduodenoscop\* or sigmoidoscop\* or diagnos\* or patholog\*).ab,kw,ti.) AND (exp artificial intelligence/ or exp machine learning/ or ("artificial intelligence" or "machine learning" or "machine intelligen\*" or computer-aided or "computational intelligen\*" or "deep learning" or "deep unified network\*" or "data mining" or datamining or "supervised learning" or "semi-supervised learning" or "unsupervised learning" or "automated pattern recognition" or "Bayesian

## Supplementary material

learning" or "computer heuristics" or "hidden Markov model\*" or "k-nearest neighbor\*" or "kernel method\*" or "learning algorithm\*" or "natural language processing" or "support vector" or "vector machine" or Gaussian or Bootstrap or "regression tree\*" or "linear discriminant analysis" or "naive Bayes" or "learning vector" or "random forest\*" or "chi-square automatic interaction detection" or "iterative dichotom\*" or fuzzy or "neural network\*" or perceptron\* or (computer adj1 heuristic\*).ab,kw,ti.) NOT (exp animal/ not exp human/, exp child/ not exp adult/, "case report".kw,pt,ti.) Limit to English

### Ovid MEDLINE(R) 1946 to Present and Epub Ahead of Print, In-Process & Other Non-Indexed Citations and Ovid MEDLINE(R) Daily:

(exp Gastrointestinal Neoplasms/ or ((digestive or gastr\* or GI or alimentary or esophag\* or oesophag\* or stomach or intestin\* or bowel\* or colon\* or colorectal or rectal or rectum or sigmoid or duoden\* or ileum or ileal or jejun\* or anal or anus) adj3 (polyp\* or mass\* or lesion\* or tumor\* or tumour\* or carcin\* or adeno\* or neoplas\* or cancer\* or malignan\* or sarcoma\* or lymphoma\* or leiomyosarcoma\*).ab,kf,ti.) AND (exp Endoscopy, Digestive System/ or exp Endoscopes, Gastrointestinal/ or (endoscop\* or enteroscop\* or gastroscop\* or colonoscop\* or duodenoscop\* or rectoscop\* or sigmoidoscop\* or ileocolonoscop\* or chromoendoscop\* or esophagogastroduodenoscop\* or esophagoscop\* or oesophagogastroduodenoscop\* or proctoscop\* or ERCP or anoscop\* or endomicroscop\* or oesophagoscop\* or gastroduodenoscop\* or sigmoidoscop\* or diagnos\* or patholog\*).ab,kf,ti.) AND (exp Artificial Intelligence/ or ("artificial intelligence" or "machine learning" or "machine intelligen\*" or computer-aided or "computational intelligen\*" or "deep learning" or "deep unified network\*" or "data mining" or datamining or "supervised learning" or "semi-supervised learning" or "unsupervised learning" or "automated pattern recognition" or "Bayesian learning" or "computer heuristics" or "hidden Markov model\*" or "k-nearest neighbor\*" or "kernel method\*" or "learning algorithm\*" or "natural language processing" or "support vector" or "vector machine" or Gaussian or Bootstrap or "regression tree\*" or "linear discriminant analysis" or "naive Bayes" or "learning vector" or "random forest\*" or "chi-square automatic interaction detection" or "iterative dichotom\*" or fuzzy or "neural network\*" or perceptron\* or (computer adj1 heuristic\*).ab,kf,ti.) NOT (exp Animals/ not Humans/, exp CHILD/ not exp ADULT/, "case report".kf,pt,ti.) Limit to English

### Scopus:

( TITLE-ABS-KEY ( ( digestive OR gastr\* OR gi OR alimentary OR esophag\* OR oesophag\* OR stomach OR intestin\* OR bowel\* OR colon\* OR colorectal OR rectal OR rectum OR sigmoid OR duoden\* OR ileum OR ileal OR jejun\* OR anal OR anus ) W/3 ( polyp\* OR mass\* OR lesion\* OR tumor\* OR tumour\* OR carcin\* OR adeno\* OR neoplas\* OR cancer\* OR malignan\* OR sarcoma\* OR lymphoma\* OR leiomyosarcoma\* ) ) ) AND ( TITLE-ABS-KEY ( endoscop\* OR enteroscop\* OR gastroscop\* OR colonoscop\* OR duodenoscop\* OR rectoscop\* OR sigmoidoscop\* OR ileocolonoscop\* OR chromoendoscop\* OR esophagogastroduodenoscop\* OR esophagoscop\* OR oesophagogastroduodenoscop\* OR proctoscop\* OR ercp OR anoscop\* OR endomicroscop\* OR oesophagoscop\* OR gastroduodenoscop\* OR sigmoidoscop\* OR diagnos\* OR patholog\* ) ) AND ( TITLE-ABS-KEY ( "artificial intelligence" OR "machine learning" OR "machine intelligen\*" OR computer-aided OR "computational intelligen\*" OR "deep learning" OR "deep unified network\*" OR "data mining" OR datamining OR "supervised learning" OR "semi-supervised learning" OR "unsupervised learning" OR "automated pattern recognition" OR "Bayesian learning" OR "computer heuristics" OR "hidden Markov model\*" OR "k-nearest neighbor\*" OR "kernel method\*" OR "learning algorithm\*" OR "natural language processing" OR "support vector" OR "vector machine" OR gaussian OR bootstrap OR "regression tree\*" OR "linear discriminant analysis" OR "naive Bayes" OR "learning vector" OR "random forest\*" OR "chi-square automatic interaction detection" OR "iterative dichotom\*" OR fuzzy OR "neural network\*" OR perceptron\* OR ( computer AND W/1 AND heuristic\* ) ) ) AND ( LIMIT-TO ( LANGUAGE , "English" ) )

### Web of Science:

TS=((digestive or gastr\* or GI or alimentary or esophag\* or oesophag\* or stomach or intestin\* or bowel\* or colon\* or colorectal or rectal or sigmoid or duoden\* or ileum or ileal or jejun\* or anal or anus) NEAR/3 (polyp\* or mass\* or lesion\* or tumor\* or tumour\* or carcin\* or adeno\* or neoplas\* or cancer\* or malignan\* or sarcoma\* or lymphoma\* or leiomyosarcoma\*)) AND TS=(endoscop\* or enteroscop\* or gastroscop\* or colonoscop\* or duodenoscop\* or rectoscop\* or sigmoidoscop\* or ileocolonoscop\* or chromoendoscop\* or esophagogastroduodenoscop\* or esophagoscop\* or oesophagogastroduodenoscop\* or proctoscop\* or ERCP or anoscop\* or endomicroscop\* or oesophagoscop\* or gastroduodenoscop\* or sigmoidoscop\* or diagnos\* or patholog\*) AND TS=("artificial intelligence" or "machine learning" or "machine intelligen\*" or computer-aided or "computational intelligen\*" or "deep learning" or "deep unified network\*" or "data mining" or datamining or "supervised learning" or "semi-supervised learning" or

## Supplementary material

"unsupervised learning" or "automated pattern recognition" or "Bayesian learning" or "computer heuristics" or "hidden Markov model\*" or "k-nearest neighbor\*" or "kernel method\*" or "learning algorithm\*" or "natural language processing" or "support vector" or "vector machine" or Gaussian or Bootstrap or "regression tree\*" or "linear discriminant analysis" or "naive Bayes" or "learning vector" or "random forest\*" or "chi-square automatic interaction detection" or "iterative dichotom\*" or fuzzy or "neural network\*" or perceptron\* or (computer NEAR/1 heuristic\*) Limit to English

## Supplementary material

**Appendix 2** MOOSE checklist. From: Stroup DF, Berlin JA, Morton SC et al. for the Meta-analysis Of Observational Studies in Epidemiology (MOOSE) Group. Meta-analysis of Observational Studies in Epidemiology. A Proposal for Reporting. JAMA. 2000;283(15):2008-2012. doi: 10.1001/jama.283.15.2008

| Item No                                     | Recommendation                                                                                                                                                                                               | Reported on Page No |
|---------------------------------------------|--------------------------------------------------------------------------------------------------------------------------------------------------------------------------------------------------------------|---------------------|
| Reporting of background should include      |                                                                                                                                                                                                              |                     |
| 1                                           | Problem definition                                                                                                                                                                                           | 5                   |
| 2                                           | Hypothesis statement                                                                                                                                                                                         | -                   |
| 3                                           | Description of study outcome(s)                                                                                                                                                                              | 5                   |
| 4                                           | Type of exposure or intervention used                                                                                                                                                                        | 5                   |
| 5                                           | Type of study designs used                                                                                                                                                                                   | 5                   |
| 6                                           | Study population                                                                                                                                                                                             | 5                   |
| Reporting of search strategy should include |                                                                                                                                                                                                              |                     |
| 7                                           | Qualifications of searchers (eg, librarians and investigators)                                                                                                                                               | 7, appendix1        |
| 8                                           | Search strategy, including time period included in the synthesis and key words                                                                                                                               | 7, appendix1        |
| 9                                           | Effort to include all available studies, including contact with authors                                                                                                                                      | 7                   |
| 10                                          | Databases and registries searched                                                                                                                                                                            | 7, appendix1        |
| 11                                          | Search software used, name and version, including special features used (eg, explosion)                                                                                                                      | Appendix1           |
| 12                                          | Use of hand searching (eg, reference lists of obtained articles)                                                                                                                                             | -na-                |
| 13                                          | List of citations located and those excluded, including justification                                                                                                                                        | Appendix1           |
| 14                                          | Method of addressing articles published in languages other than English                                                                                                                                      | -na-                |
| 15                                          | Method of handling abstracts and unpublished studies                                                                                                                                                         | 7                   |
| 16                                          | Description of any contact with authors                                                                                                                                                                      | 7                   |
| Reporting of methods should include         |                                                                                                                                                                                                              |                     |
| 17                                          | Description of relevance or appropriateness of studies assembled for assessing the hypothesis to be tested                                                                                                   | 7-8                 |
| 18                                          | Rationale for the selection and coding of data (eg, sound clinical principles or convenience)                                                                                                                | 7-8                 |
| 19                                          | Documentation of how data were classified and coded (eg, multiple raters, blinding and inter-rater reliability)                                                                                              | -na-                |
| 20                                          | Assessment of confounding (eg, comparability of cases and controls in studies where appropriate)                                                                                                             | -na-                |
| 21                                          | Assessment of study quality, including blinding of quality assessors, stratification or regression on possible predictors of study results                                                                   | 7-8                 |
| 22                                          | Assessment of heterogeneity                                                                                                                                                                                  | 8                   |
| 23                                          | Description of statistical methods (eg, complete description of fixed or random effects models, justification of whether the chosen models account for predictors of study results, dose-response models, or | 8                   |

## Supplementary material

|                                     |                                                                     |                                     |
|-------------------------------------|---------------------------------------------------------------------|-------------------------------------|
|                                     | cumulative meta-analysis) in sufficient detail to be replicated     |                                     |
| 24                                  | Provision of appropriate tables and graphics                        | Tables 1, 3, supplemental materials |
| Reporting of results should include |                                                                     |                                     |
| 25                                  | Graphic summarizing individual study estimates and overall estimate | Supplementary materials             |
| 26                                  | Table giving descriptive information for each study included        | Table 1                             |
| 27                                  | Results of sensitivity testing (eg, subgroup analysis)              | 11                                  |
| 28                                  | Indication of statistical uncertainty of findings                   | 12                                  |

## Supplementary material

| Item No                                 | Recommendation                                                                                                            | Reported on Page No |
|-----------------------------------------|---------------------------------------------------------------------------------------------------------------------------|---------------------|
| Reporting of discussion should include  |                                                                                                                           |                     |
| 29                                      | Quantitative assessment of bias (eg, publication bias)                                                                    | 12                  |
| 30                                      | Justification for exclusion (eg, exclusion of non-English language citations)                                             | -na-                |
| 31                                      | Assessment of quality of included studies                                                                                 | -na-                |
| Reporting of conclusions should include |                                                                                                                           |                     |
| 32                                      | Consideration of alternative explanations for observed results                                                            | 13-15               |
| 33                                      | Generalization of the conclusions (ie, appropriate for the data presented and within the domain of the literature review) | 13-15               |
| 34                                      | Guidelines for future research                                                                                            | 15                  |

## Supplementary material

Supplementary Fig. 1 Literature search flow chart.

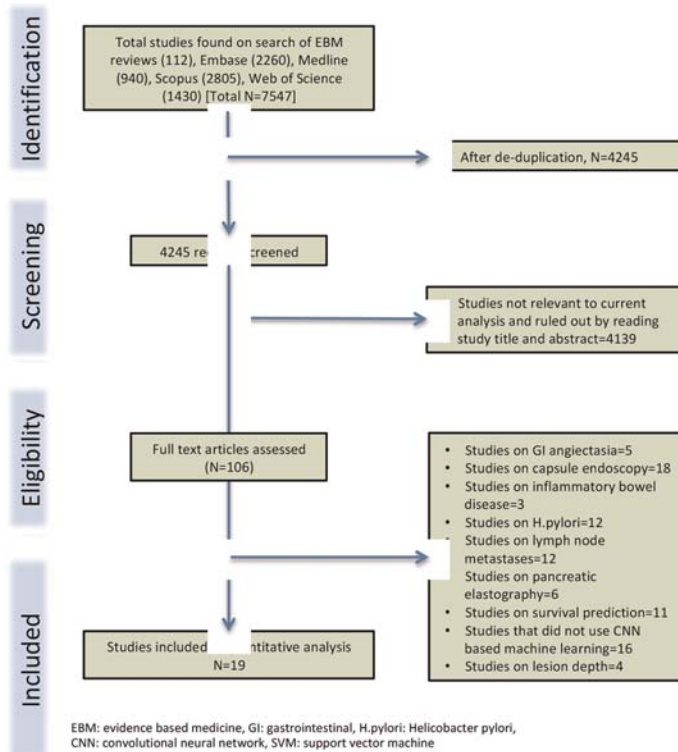

Supplement: 1908supmat_10-1055-a-1236-3007.pdf [file 1908supmat_10-1055-a-1236-3007.pdf]
